# Supplementary material for: Key role of MIF-related neuroinflammation in neurodegeneration and cognitive impairment in Alzheimer’s disease
Source: PubMed Central journal article supplement (PMC7164357; doi:10.1186/s10020-020-00163-5), 2020-04-17
Supplement: 10020_2020_163_MOESM1_ESM.pdf [file 10020_2020_163_MOESM1_ESM.pdf]

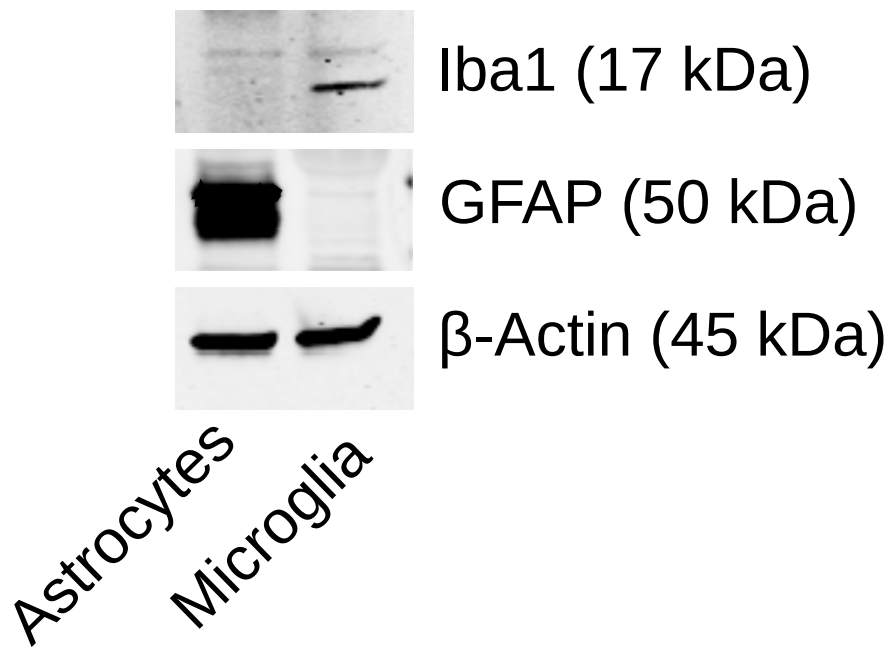

**Supplementary Figure 1**
